# Supplementary material
Source: PubMed Central journal article supplement (PMC11107490)
Supplement: 18_2016_2423_MOESM1_ESM.pdf [file 18_2016_2423_MOESM1_ESM.pdf]

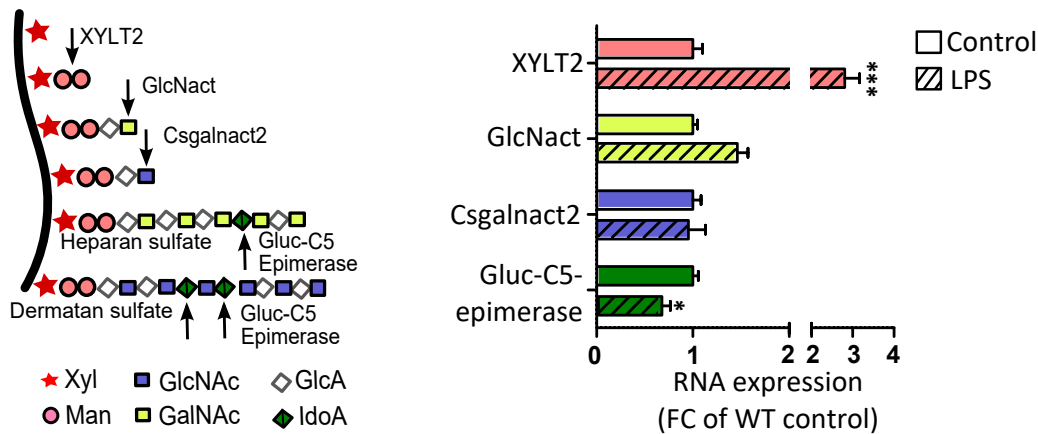

**SUPPLEMENTARY FIGURE 1:**

Bone marrow-derived macrophages (BMDMs) from WT mice were isolated and stimulated with LPS (10 ng/ml). The expression of glycosylation enzyme XYLT2 increased in response to LPS while gluc-C5-epimerase expression decreased (\*p < 0.05; \*\*\*p < 0.001) XYLT2: Xylosyl transferase; gluc-C5-epimerase: 2 D-glucuronyl C5-epimerase; Glcnact: glycosyl-transferase; Csgalnact2: N-acetylgalactosaminyltransferases; Xyl: Xylose; Man: Mannose; GalNAc: N-acetylgalactosamine; GlcNAc: N-acetylglucosamine; GlcA: Glucuronic acid; IdoA: Iduronic acid

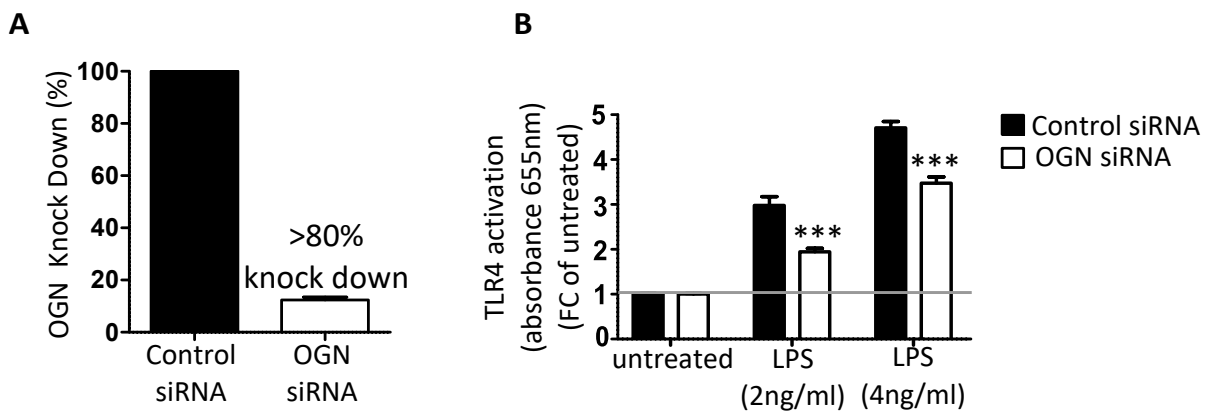

**SUPPLEMENTARY FIGURE 2:**

(A) HEK-Blue™ mTLR cells were treated with control siRNA and siRNA for OGN. RNA expression revealed a knockdown of approximately 80%. (B) HEK-Blue™ mTLR cells were treated with different doses of LPS. Knock down of OGN resulted in reduced TLR4 activation in all doses (\*\*\*p < 0.001).

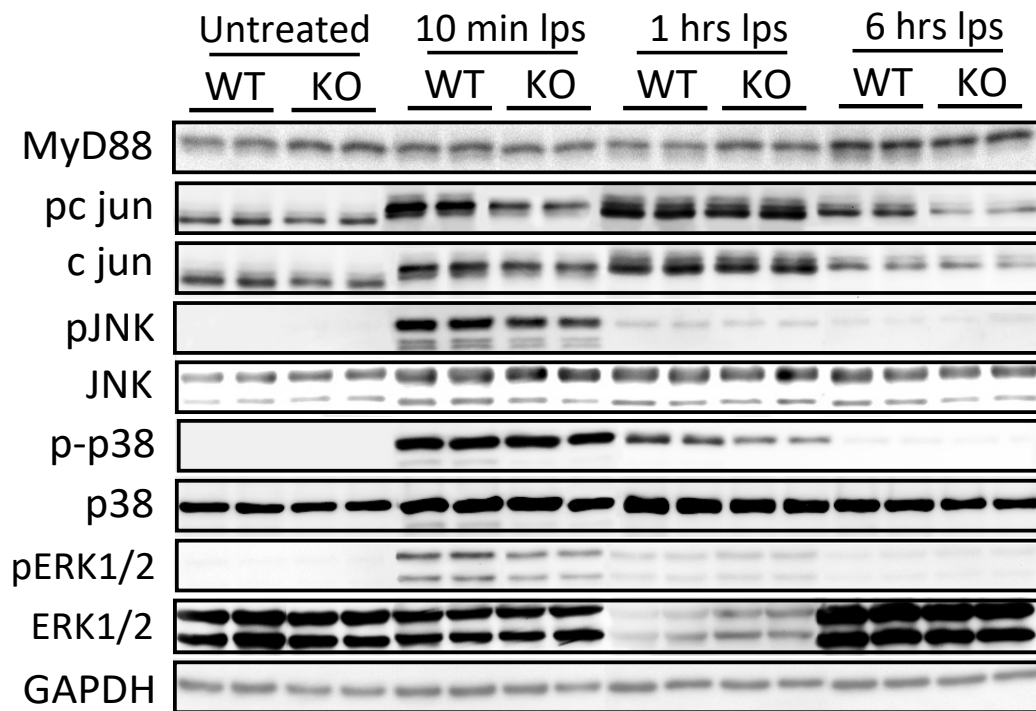

**SUPPLEMENTARY FIGURE 3: OGN PROMOTES TLR4 ACTIVATION BY ENHANCING MAPK-INDUCED CYTOKINE PRODUCTION, 1 HOUR TIME POINT INCLUDED.**
